# Supplementary material for: Spreading dynamics of reactive surfactants driven by Marangoni convection
Source: Royal Society of Chemistry journal article supplement (doi:10.1039/c8sm02641f), 2019-01-01
Supplement: c8sm02641f1.pdf [file c8sm02641f1.pdf]

## Supplementary Information: Spreading dynamics of reactive surfactants driven by Marangoni convection

Thomas Bickel

*Univ. Bordeaux, CNRS, Laboratoire Ondes et Matière d'Aquitaine (UMR 5798), F-33400 Talence, France*

In these notes, we give some technical details regarding the derivation of equations (5) and (9).

### I. CLOSURE RELATION FOR THE INTERFACIAL VELOCITY

Since the Stokes equations are linear, one expects a linear relationship between the interfacial velocity and the concentration [1, 2]. In the Stokes regime, the velocity field  $\mathbf{v}(x, z) = v_x(x, z)\mathbf{e}_x + v_z(x, z)\mathbf{e}_z$  obeys the equations

$$\eta \nabla^2 \mathbf{v} = \nabla p, \quad \text{and} \quad \nabla \cdot \mathbf{v} = 0, \quad (1)$$

together with the boundary conditions (BCs)

$$v_z|_{z=0} = 0, \quad (2a)$$

$$\eta (\partial_z v_x + \partial_x v_z)|_{z=0} = -\gamma_1 \frac{\partial_x \Gamma}{\Gamma_0}. \quad (2b)$$

Define the Fourier transform of  $f(x)$  as

$$\tilde{f}(q) = \mathcal{F}[f(x)] = \int_{-\infty}^{\infty} f(x) e^{-iqx} dx,$$

the Stokes equations can be rewritten as

$$\eta (-q^2 \tilde{v}_x + \partial_z^2 \tilde{v}_x) = iq \tilde{p}, \quad (3a)$$

$$\eta (-q^2 \tilde{v}_z + \partial_z^2 \tilde{v}_z) = \partial_z \tilde{p}, \quad (3b)$$

$$iq \tilde{v}_x + \partial_z \tilde{v}_z = 0, \quad (3c)$$

and the BCs at the free interface now read

$$\tilde{v}_z(q, 0) = 0, \quad (4a)$$

$$\partial_z \tilde{v}_x|_{z=0} = -iq \frac{\gamma_1}{\eta \Gamma_0} \tilde{\Gamma}(q). \quad (4b)$$

After some algebra, one can show that eqn (3) can be recast in a single equation for the vertical component of the velocity

$$(\partial_z^4 - 2q^2 \partial_z + q^4) \tilde{v}_z = 0.$$

The liquid being confined to the half-space  $z < 0$ , the solution that satisfies the BC (4a) is

$$\tilde{v}_z(q, z) = B z e^{|q|z}.$$

According to eqn (3c), the horizontal component is obtained as

$$\tilde{v}_x(q, z) = \frac{iB}{q} (1 + |q|z) e^{|q|z}.$$

Enforcing the Marangoni BC (4b), one finally gets

$$B = -\frac{\gamma_1}{2\eta \Gamma_0} \frac{q^2}{|q|} \tilde{\Gamma}(q).$$

In particular, the interfacial velocity is obtained in Fourier representation

$$\tilde{v}_x(q, 0) = -i \frac{\gamma_1}{2\eta \Gamma_0} \text{sgn}(q) \tilde{\Gamma}(q). \quad (5)$$

The inverse transform then involves a convolution product

$$v_x(x, 0) = \frac{\gamma_1}{2\eta \Gamma_0} \int_{-\infty}^{\infty} dx' \Gamma(x') K(x - x'),$$

with  $K(x) = \mathcal{F}^{-1}[-i \text{sgn}(q)] = 1/(\pi x)$ , so that one eventually gets the desired relation

$$v_x(x, 0) = \frac{\gamma_1}{2\eta \Gamma_0} \int_{-\infty}^{\infty} dx' \frac{\Gamma(x')}{\pi(x - x')}. \quad (6)$$

Note that the improper integral is understood in the sense of the principal value.

### II. PROPERTIES OF HILBERT TRANSFORMS

The Hilbert transform of a function  $f(x)$  is defined as [3]

$$\mathcal{H}[f(x)] = \frac{1}{\pi} \int_{-\infty}^{\infty} \frac{f(y)}{x - y} dy, \quad (7)$$

where the dashed integral refers to the Cauchy principal value. The Hilbert transform satisfies the following properties [3]

$$\mathcal{H}[\partial_x f] = \partial_x \mathcal{H}[f(x)], \quad (8a)$$

$$\mathcal{H}[x f(x)] = x \mathcal{H}[f(x)] - \int_{-\infty}^{\infty} f(u) du. \quad (8b)$$

In the following, we shall consider the function  $g(x)$  defined as

$$g(x) = \begin{cases} \sqrt{\xi^2 - x^2} & \text{for } |x| < \xi, \\ 0 & \text{otherwise.} \end{cases}$$

Taking the Hilbert transform, we therefore get

$$\mathcal{H}[g(x)] = \begin{cases} x & \text{for } |x| < \xi, \\ x - \text{sgn}(x) \sqrt{x^2 - \xi^2} & \text{otherwise.} \end{cases}$$

Moreover, according to Eq. (8b), we also have

$$\mathcal{H}[x g(x)] = \begin{cases} x^2 - \frac{\xi^2}{2} & \text{for } |x| < \xi, \\ x^2 - \frac{\xi^2}{2} - |x| \sqrt{x^2 - \xi^2} & \text{otherwise.} \end{cases}$$

### III. DERIVATION OF THE TIME EVOLUTION EQUATIONS FOR $\mathcal{A}(t)$ AND $\xi(t)$ .

In rescaled variables, the concentration of surfactants obeys the following nonlinear equation

$$\partial_t \Gamma + \partial_x (\Gamma \mathcal{H}[\Gamma]) = -\alpha \Gamma . \quad (9)$$

Inspired by previous work [1, 2], we consider a semi-circle distribution

$$\Gamma(x, t) = \mathcal{A}(t) \sqrt{\xi^2(t) - x^2} , \quad (10)$$

for  $|x| < \xi(t)$ , and  $\Gamma(x, t) = 0$  otherwise. Here,  $\mathcal{A}(t)$  and  $\xi(t)$  are two positive functions. We get for this particular choice the relation

$$\Gamma(x, t) \mathcal{H}[\Gamma(x, t)] = \mathcal{A}(t) x \Gamma(x, t) .$$

The derivation then consists in taking the Hilbert transform of eqn (9) with  $\Gamma(x, t)$  defined by (10). We first proceed in the domain  $|x| < \xi(t)$ . Making use of

eqn (8a), it is straightforward to obtain

$$x \left( \dot{\mathcal{A}} + 2\mathcal{A}^2 + \alpha \mathcal{A} \right) = 0 .$$

But this equation has to be satisfied for all  $|x| < \xi(t)$ : the term between parenthesis must necessarily vanish, leading to the first equation

$$\dot{\mathcal{A}} + 2\mathcal{A}^2 + \alpha \mathcal{A} = 0 . \quad (11)$$

We proceed in the same manner for  $|x| > \xi(t)$ : although the algebra is slightly more tedious, the Hilbert transform of eqn (9) now leads to

$$(x^2 - \xi^2) \left( \dot{\mathcal{A}} + 2\mathcal{A}^2 + \alpha \mathcal{A} \right) = \mathcal{A} \xi \left( \dot{\xi} - \mathcal{A} \xi \right) ,$$

so that we get the second equation

$$\dot{\xi} = \mathcal{A} \xi . \quad (12)$$

We therefore end up with a set of ordinary differential eqns (11)–(12) that, even though nonlinear, is tractable analytically using standard technics.

[1] A. Thess, D. Spirn and B. Jüttner, *Phys. Rev. Lett.*, 1995, 75, 4614–4617.

[2] A. Thess, D. Spirn and B. Jüttner, *J. Fluid Mech.*, 1997, 331, 283–312.

[3] R. Piessens, The Hankel Transform. In *Transforms and Applications Handbook*, CRC Press, 2010.
